# Supplementary material for: Quantification of creatinine in whole blood by a paper-based device using an RGB sensor
Source: Royal Society of Chemistry journal article supplement (doi:10.1039/d4ay01476f), 2024-01-01
Supplement: d4ay01476f3.pdf [file d4ay01476f3.pdf]

## Supplementary Material

### Quantification of Creatinine on Paper-based Devices from Whole Blood using RGB Sensor

Neha Gautam<sup>1</sup>, Ranjana Verma<sup>1</sup>, Priya Ranjan Muduli<sup>2</sup>, Shantimoy Kar<sup>3,4\*</sup>, Arnab Sarkar<sup>1\*</sup>

<sup>1</sup>Department of Mechanical Engineering, Indian Institute of Technology (BHU), Varanasi-221005, India.

<sup>2</sup>Department of Electronics Engineering, Indian Institute of Technology (BHU), Varanasi-221005, India.

<sup>3</sup>Department of Medical Devices, National Institute of Pharmaceutical Education and Research, Hyderabad-500037, India.

<sup>4</sup>Department of Biotechnology, GITAM School of Technology, Visakhapatnam, India - 530045

**\*Corresponding Authors:** Arnab Sarkar and Shantimoy Kar

**Email:** [arnab.mec@iitbhu.ac.in](mailto:arnab.mec@iitbhu.ac.in); [shantimoykar@gmail.com](mailto:shantimoykar@gmail.com)

## Index

Fig. S1 Blood-plasma separation and reaction mechanism on fabricated paper-based device.

Fig. S2 Graph between plasma separation time vs different hematocrit blood sample.

Fig. S3. (a) 3D projection of LF1 filter paper and (b) Whatman grade 1 filter paper

Fig. S4. (a) Surface height histogram of LF1 (b) Whatman grade 1

Fig. S5. Schematic showing Jaffé reaction between creatinine and picric acid in NaOH

Table S1 Accuracy table for creatinine measurement using our developed device and gold standard data

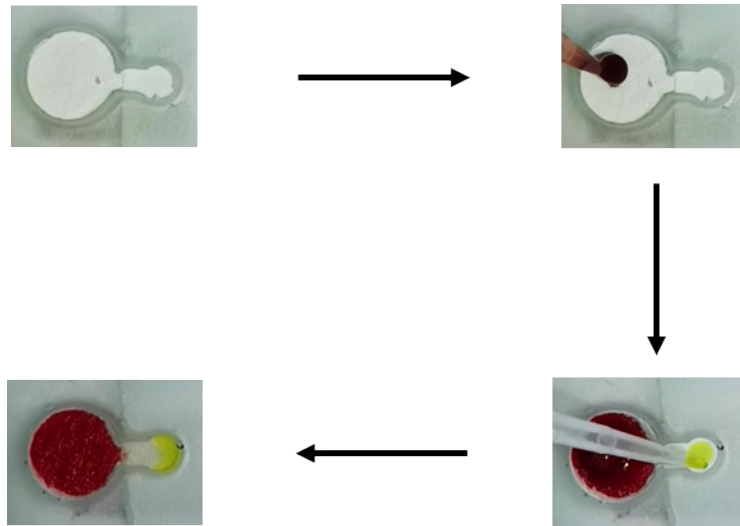

Fig. S1. Blood-plasma separation and reaction mechanism on fabricated paper-based device.

---

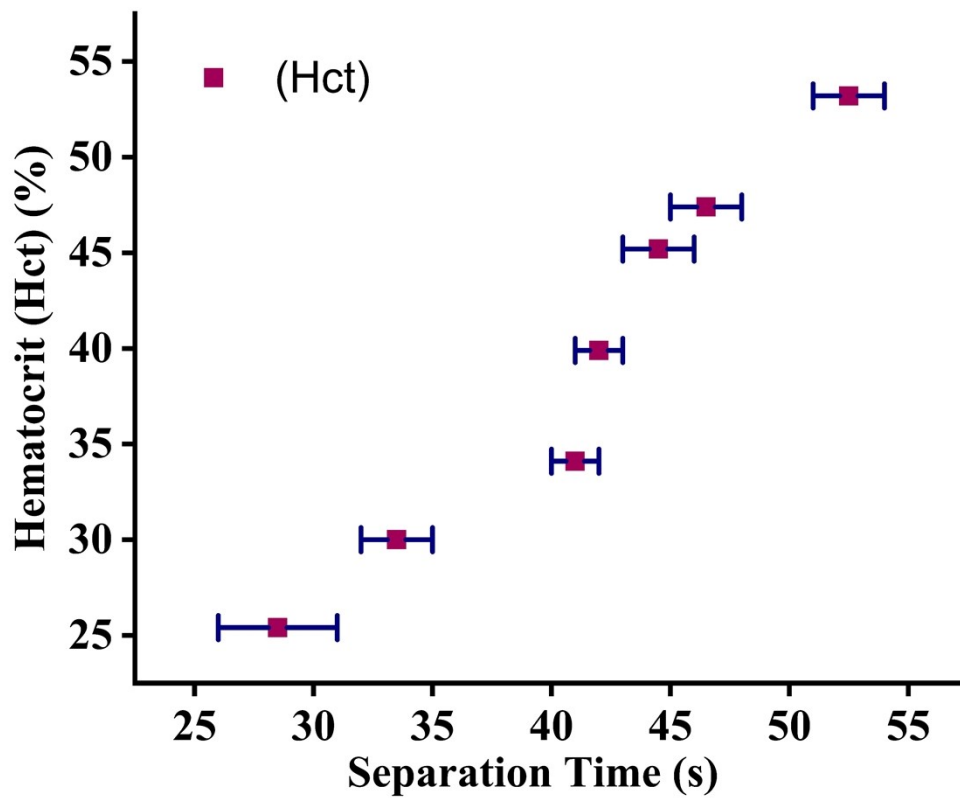

Fig. S2. Graph between plasma separation time vs different hematocrit blood sample.

---

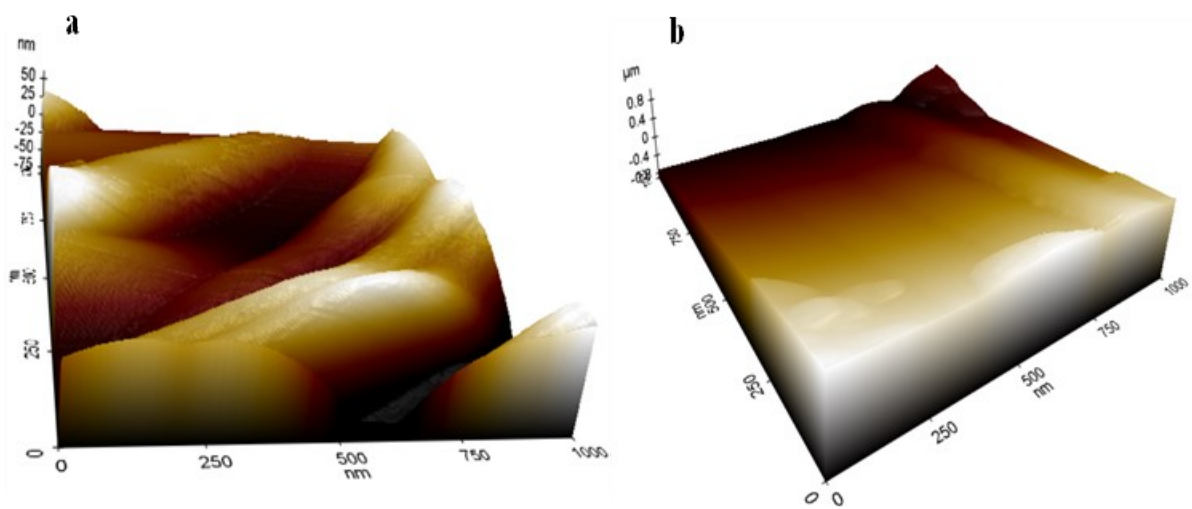

Fig. S3. (a) 3D projection of LF1 filter paper and (b) Whatman grade 1 filter paper

---

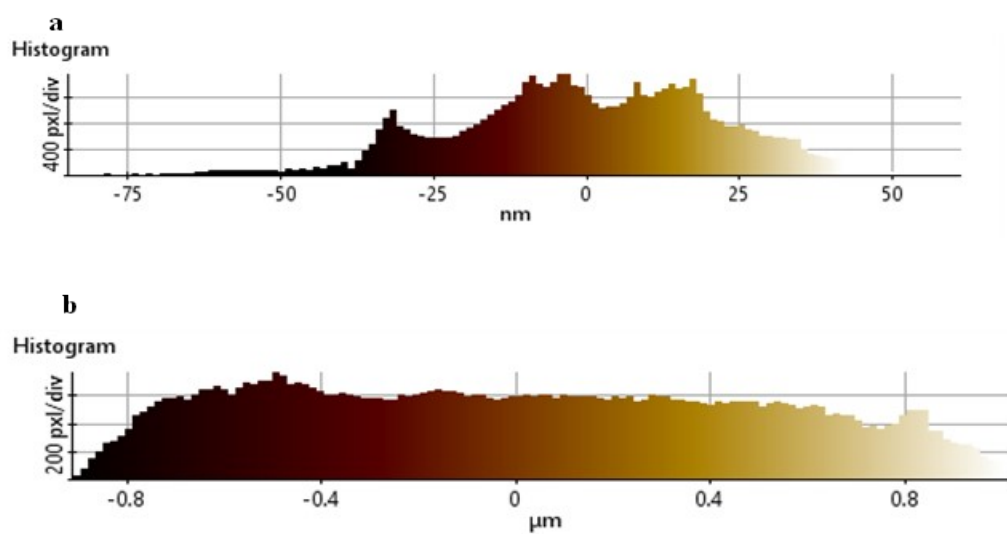

Fig. S4. (a) Surface height histogram of LF1 (b) Whatman grade 1

---

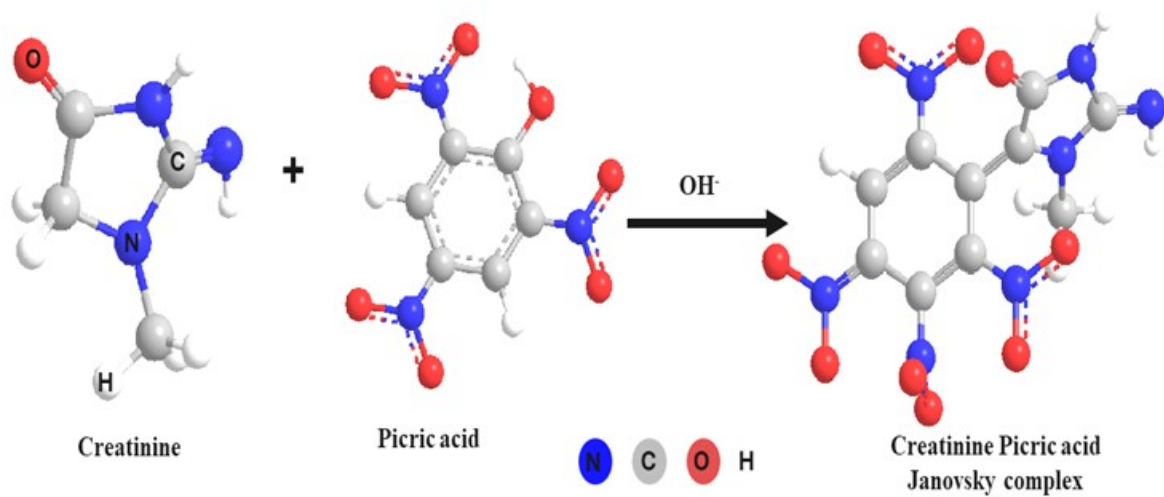

Fig. S5. Schematic showing Jaffé reaction between creatinine and picric acid in NaOH

---

Table S1 Accuracy table for creatinine measurement using our developed device and gold standard data

| S.N. | Creatinine measurement using paper sensor (mg/dL) | Creatinine measurement using the gold standard device (mg/dL) | Accuracy of our developed method | Median       |
|------|---------------------------------------------------|---------------------------------------------------------------|----------------------------------|--------------|
| 1    | 0.21                                              | 0.25                                                          | 80.95                            | <b>94.05</b> |
| 2    | 0.52                                              | 0.47                                                          | 90.38                            |              |
| 3    | 0.56                                              | 0.50                                                          | 89.28                            |              |
| 4    | 0.58                                              | 0.62                                                          | 93.10                            |              |
| 5    | 0.6                                               | 0.56                                                          | 93.33                            |              |
| 6    | 0.64                                              | 0.58                                                          | 90.62                            |              |
| 7    | 0.64                                              | 0.59                                                          | 92.19                            |              |
| 8    | 0.65                                              | 0.60                                                          | 92.31                            |              |
| 9    | 0.67                                              | 0.62                                                          | 92.54                            |              |
| 10   | 0.68                                              | 0.70                                                          | 97.06                            |              |
| 11   | 0.70                                              | 0.65                                                          | 92.86                            |              |
| 12   | 0.72                                              | 0.75                                                          | 95.83                            |              |
| 13   | 0.75                                              | 0.71                                                          | 94.67                            |              |
| 14   | 0.77                                              | 0.70                                                          | 90.91                            |              |
| 15   | 0.78                                              | 0.72                                                          | 92.31                            |              |
| 16   | 0.80                                              | 0.83                                                          | 96.25                            |              |
| 17   | 0.84                                              | 0.79                                                          | 94.05                            |              |
| 18   | 0.86                                              | 0.92                                                          | 93.02                            |              |
| 19   | 0.90                                              | 0.90                                                          | 100.00                           |              |
| 20   | 0.92                                              | 1.10                                                          | 80.43                            |              |
| 21   | 0.94                                              | 0.89                                                          | 94.68                            |              |
| 22   | 0.97                                              | 0.95                                                          | 97.94                            |              |
| 23   | 0.99                                              | 1.16                                                          | 82.83                            |              |
| 24   | 1.00                                              | 0.90                                                          | 90.00                            |              |
| 25   | 1.30                                              | 1.64                                                          | 73.85                            |              |
| 26   | 1.70                                              | 1.65                                                          | 97.06                            |              |
| 27   | 2.90                                              | 2.80                                                          | 96.55                            |              |
| 28   | 3.80                                              | 3.70                                                          | 97.37                            |              |
| 29   | 4.90                                              | 5.10                                                          | 95.92                            |              |
| 30   | 5.10                                              | 4.80                                                          | 94.12                            |              |
| 31   | 7.40                                              | 7.20                                                          | 97.30                            |              |
| 32   | 8.50                                              | 8.80                                                          | 96.47                            |              |
| 33   | 9.80                                              | 9.30                                                          | 94.90                            |              |

|    |       |       |       |  |
|----|-------|-------|-------|--|
| 34 | 12.90 | 13.12 | 98.29 |  |
| 35 | 14.80 | 15.00 | 98.65 |  |
